# Supplementary material for: Seed bio-priming with beneficial Trichoderma harzianum alleviates cold stress in maize
Source: PeerJ. 2023 Aug 25;11:e15644. doi: 10.7717/peerj.15644 (PMC10461543; doi:10.7717/peerj.15644)
Supplement: Supplemental Information 5 — The mean comparison of the measured traits was extracted from this. [file peerj-11-15644-s005.xlsx]

## Sheet: Data
S	V	P	R	Stabilizing speed	Monitor stability	Feather proxidase	Feather catalase	Feather length	Feather size	Feather weight	Catalase Berg	Berg peroxidase	Plyphenol oxidase tower	Proline	soluble protein	Berg length	Weight of the tower	Ch la	Chl b	carotenoeid	fv/m	fo	fm
S	V	P	R	trait1	trait2	trait3	trait4	trait5	trait6	trait7	trait8	trait9	trait10	trait11	trait12	trait13	trait14	Chla	Chlb	carotenoeid	fvm	fo	fm
control	A	0	1	0.27	85	70.9893	24.9637	25.4	3.24	4.88	29.1364	67.4911	47.2938	3.47583	17.8229	17.8	0.331	23.442	3.8824	130.667	0.673	121	381
control	A	0	2	0.324	87	85.1871	29.9564	30.48	3.888	5.856	34.9637	80.9893	56.7525	4.17099	21.3874	21.36	0.3972	28.1304	4.65888	156.801	0.8076	145	372
control	A	0	3	0.216	87	56.7914	19.9709	20.32	2.592	3.904	23.3091	53.9929	37.835	2.78066	14.2583	14.24	0.2648	18.7536	3.10592	104.534	0.5384	96	383
control	A	1	1	0.412	97	78.8061	43.2371	42	11.48	10.62	36.0309	74.0051	54.5024	5.58177	21.0103	61.3	0.428	27.386	4.969	166.653	0.683	177	661
control	A	1	2	0.4944	96	94.5673	51.8845	50.4	13.776	12.744	43.2371	88.8061	65.4029	6.69813	25.2123	73.56	0.5136	32.8632	5.9628	199.984	0.8196	212	666
control	A	1	3	0.3296	98	63.0449	34.5897	33.6	9.184	8.496	28.8247	59.2041	43.6019	4.46542	16.8082	49.04	0.3424	21.9088	3.9752	133.322	0.5464	141	669
control	A	2	1	0.37	90	74.0442	25.2568	41.32	7.9	9.68	29.3807	70.0369	48.131	4.56652	19.71	35	0.3564	24.0253	4.8144	159.696	0.682	155	471
control	A	2	2	0.444	92	88.8531	30.3082	49.584	9.48	11.616	35.2568	84.0442	57.7572	5.47982	23.6521	42	0.42768	28.8304	5.77728	191.636	0.8184	186	477
control	A	2	3	0.296	92	59.2354	20.2055	33.056	6.32	7.744	38.5046	56.0295	38.5048	3.65321	15.768	28	0.28512	19.2203	3.85152	127.757	0.5456	124	475
control	A	3	1	0.566	100	76.5046	38.0069	45.7	12.56	12.2	31.6724	72.0872	50.2513	5.78667	20.2997	63.4	0.4614	26.4336	5.927	192.654	0.737	209	675
control	A	3	2	0.6792	99	91.8056	45.6083	54.84	15.072	14.64	38.0069	86.5046	60.3015	6.944	24.3596	72	0.55368	31.7203	7.1124	231.184	0.8844	250	681
control	A	3	3	0.4528	99	61.2037	30.4055	36.56	10.048	9.76	25.3379	57.6698	40.201	4.62934	16.2398	48	0.36912	21.1469	4.7416	154.123	0.5896	167	668
control	k	0	1	0.15	80	80.7631	36.6437	15.3	1.82	2.62	30.5364	75.636	43.4739	4.555	16.892	14.7	0.176	13.4845	3.2075	35.9571	0.796	90	737
control	k	0	2	0.18	82	96.9158	43.9724	18.36	2.184	3.144	36.6437	90.7631	52.1687	5.466	20.2704	17.64	0.2112	16.1814	3.849	43.1485	0.9552	108	734
control	k	0	3	0.12	81	64.6105	29.315	12.24	1.456	2.096	24.4291	60.5088	34.7791	3.644	13.5136	11.76	0.1408	10.7876	2.566	28.7657	0.6368	72	737
control	k	1	1	0.317	90	88.5215	60.6149	19.23	2.62	3.74	44.6791	82.1012	54.397	5.91013	20.7518	45	0.4012	15.896	3.6381	57.9164	0.877	171	932
control	k	1	2	0.3804	90	106.226	72.7378	23.076	3.144	4.488	60.6149	98.5215	65.2764	7.09216	24.9021	54	0.48144	19.0752	4.36572	69.4997	1.0524	205	938
control	k	1	3	0.2536	89	70.8172	48.4919	15.384	2.096	2.992	35.7432	65.681	43.5176	4.72811	16.6014	36	0.32096	12.7168	2.91048	46.3331	0.7016	136	928
control	k	2	1	0.281	76	82.0241	43.4317	17.6	2.732	3.21	36.1931	76.6868	51.7153	4.96983	18.0203	22	0.2442	14.0767	3.231	46.6816	0.843	145	842
control	k	2	2	0.3372	77	98.429	52.1181	21.12	3.2784	3.852	43.4317	92.0241	62.0583	5.96379	21.6244	26.4	0.29304	16.8921	3.8772	56.018	1.0116	174	840
control	k	2	3	0.2248	77	65.6193	34.7454	14.08	2.1856	2.568	28.9545	61.3494	41.3722	3.97586	14.4163	17.6	0.19536	11.2614	2.5848	37.3453	0.6744	116	848
control	k	3	1	0.436	98	86.0136	46.6849	28.4	3.58	8.22	38.9041	80.0114	52.73	5.97357	19.5026	48	0.486	17.0192	3.7731	94.2315	0.889	198	992
control	k	3	2	0.5232	101	103.216	56.0219	34.08	4.296	9.864	46.6849	96.0136	63.276	7.16828	23.4031	57.6	0.5832	20.4231	4.52772	113.078	1.0668	237	992
control	k	3	3	0.3488	100	68.8109	37.3479	22.72	2.864	6.576	31.1233	64.0091	42.184	4.77885	15.602	38.4	0.3888	13.6154	3.01848	75.3852	0.7112	158	998
Cool	A	0	1	0.192	58	74.1845	31.0922	29.4	2.88	3.24	25.9102	70.1537	50.5909	5.58907	19.9438	16.2	0.224	22.9183	4.9695	91.7507	0.81	81	914
Cool	A	0	2	0.2304	61	89.0214	37.3106	35.28	3.456	3.888	31.0922	84.1845	60.7091	6.70688	23.9326	19.44	0.2688	27.502	5.9634	110.101	0.972	97	908
Cool	A	0	3	0.1536	60	59.3476	24.8738	23.52	2.304	2.592	20.7281	56.123	40.4727	4.47126	15.9551	12.96	0.1792	18.3347	3.9756	73.4006	0.648	64	908
Cool	A	1	1	0.451	88	86.7166	48.0354	41.6	9.62	10.56	40.0295	80.5972	65.9553	7.01234	22.1668	56.7	0.3858	24.8983	4.8824	186.654	0.834	157	596
Cool	A	1	2	0.5412	91	104.06	57.6425	49.92	11.544	12.672	48.0354	96.7166	79.1463	8.41481	26.6001	68.04	0.46296	29.878	5.85888	223.984	1.0008	188	603
Cool	A	1	3	0.3608	88	69.3733	38.4283	33.28	7.696	8.448	32.0236	64.4778	52.7642	5.60987	17.7334	45.36	0.30864	19.9187	3.90592	149.323	0.6672	125	593
Cool	A	2	1	0.302	70	76.7235	33.8267	36.7	8.54	8.9	28.1889	72.2696	55.6717	4.81311	20.1204	26	0.3596	23.7658	4.8497	160.667	0.828	135	204
Cool	A	2	2	0.3624	69	92.0682	40.5921	44.04	10.248	10.68	33.8267	86.7235	66.8061	5.77573	24.1445	31.2	0.43152	28.519	5.81964	192.8	0.9936	162	202
Cool	A	2	3	0.2416	70	61.3788	27.0614	29.36	6.832	7.12	22.5511	57.8157	44.5374	3.85049	16.0963	20.8	0.28768	19.0126	3.87976	128.534	0.6624	108	199
Cool	A	3	1	0.514	90	85.9815	37.0474	45.8	12.2	11.48	30.8729	79.9846	61.4605	6.51023	21.9767	55.9	0.4016	28.4336	5.759	191.488	0.864	173	970
Cool	A	3	2	0.6168	92	103.178	44.4569	54.96	14.64	13.776	37.0474	95.9815	73.7526	7.81227	26.372	67.08	0.48192	34.1203	6.9108	229.786	1.0368	207	971
Cool	A	3	3	0.4112	92	68.7852	29.6379	36.64	9.76	9.184	24.6983	63.9877	49.1684	5.20818	17.5813	44.72	0.32128	22.7469	4.6072	153.191	0.6912	138	974
Cool	k	0	1	0.118	50	100.306	32.2347	32.6	2.62	3.82	26.8623	83.5885	55.043	4.3621	15.2332	11.9	0.092	15.9938	3.1605	30.3772	0.731	39	145
Cool	k	0	2	0.1416	49	120.368	38.6817	39.12	3.144	4.584	32.2347	100.306	66.0517	5.23452	18.2799	14.28	0.1104	19.1926	3.7926	36.4527	0.8772	46	138
Cool	k	0	3	0.0944	50	80.245	25.7878	26.08	2.096	3.056	21.4898	66.8708	44.0344	3.48968	12.1866	9.52	0.0736	12.7951	2.5284	24.3018	0.5848	31	147
Cool	k	1	1	0.302	65	110.278	49.4212	22.7	3.242	5.58	41.1843	94.3982	72.6848	7.48849	18.2487	22.6	0.3674	21.4872	4.8728	65.928	0.784	190	705
Cool	k	1	2	0.3624	66	132.333	59.3054	27.24	3.8904	6.696	49.4212	113.278	87.2218	8.98619	21.8984	27.12	0.44088	25.7846	5.84736	79.1136	0.9408	228	707
Cool	k	1	3	0.2416	67	88.2223	39.5369	18.16	2.5936	4.464	32.9475	75.5186	58.1478	5.99079	14.5989	18.08	0.29392	17.1897	3.89824	52.7424	0.6272	152	698
Cool	k	2	1	0.206	55	96.614	43.6272	20.9	3.74	4.73	50.356	80.5117	56.9321	5.92117	16.8947	18.3	0.244	21.4203	4.6556	55.336	0.765	152	698
Cool	k	2	2	0.2472	57	115.937	52.3526	25.08	4.488	5.676	43.6272	96.614	68.3185	7.1054	20.2737	21.96	0.2928	25.7043	5.58672	66.4032	0.918	182	693
Cool	k	2	3	0.1648	54	77.2912	34.9018	16.72	2.992	3.784	29.0848	64.4093	45.5457	4.73693	13.5158	14.64	0.1952	17.1362	3.72448	44.2688	0.612	121	707
Cool	k	3	1	0.39	70	102.718	47.2947	19.8	8.22	7.732	39.4123	85.5985	69.7691	6.87769	18.4488	25.1	0.4406	23.2516	5.7925	90.3593	0.8	195	954
Cool	k	3	2	0.468	72	123.262	56.7536	23.76	9.864	9.2784	47.2947	102.718	83.7229	8.25323	22.1386	24.12	0.52872	27.9019	6.951	108.431	0.96	234	949
Cool	k	3	3	0.312	69	82.1746	37.8358	15.84	6.576	6.1856	31.5298	68.4788	55.8153	5.50215	14.7591	16.08	0.35248	18.6013	4.634	72.2874	0.64	156	952
